# Supplementary material for: Histone Deacetylase Inhibitor, Panobinostat Exerts Anti-proliferative Effect with Partial Normalization from Aberrant Epigenetic States on Granulosa Cell Tumor Cell Lines
Source: Research Square preprint supplement (doi:10.21203/rs.3.rs-265240/v1), 2021-03-04
Supplement: Supplementary file 2 [file 2c4b7ef31b769d2c00c2c171.xlsx]

## Sheet: Supplementary Figure 1
Table S1. Genes included in each heat map
KEGG_ADHERENS _JUNCTION	KEGG_CELL_ ADHESION_MOLECULES	REACTOME_NEUROTRANSMITTER_ RELEASE_CYCLE
LMO7	CD274	SYN1
WASF3	HLA-DPA1	ABAT
SNAI1	HLA-DRA	SYN2
CDH1	CNTN1	SLC17A7
FYN	HLA-DPB1	SLC1A6
PTPRM	HLA-DMB	APBA1
IGF1R	L1CAM	MAOA
EGFR	NCAM1	SLC18A3
BAIAP2	NRCAM	RAB3A
PTPRJ	F11R	SLC1A1
SNAI2	CDH1	SNAP25
PTPN1	ITGA6	STX1A
MET	PTPRM	SYT1
FER	NRXN2	UNC13B
FGFR1	HLA-DOB	RIMS1
TCF7L2	SDC2	SYN3
NLK	HLA-DOA	STXBP1
MAPK3	CADM1	PPFIA4
PTPRF	NEO1	GAD1
CTNNA1	HLA-DMA	SLC32A1
LEF1	NLGN2	SLC6A1
ACTN4	NFASC	GAD2
ACTN2	ITGAV	SLC18A2
TCF7L1	CD58	LIN7A
FARP2	CD40	SLC6A11
ACTN3	MPZL1	SLC6A12
CTNNA3	HLA-DQB1	CASK
IQGAP1	CD22	SLC1A3
ACTB	NEGR1	DNAJC5
RAC2	ITGA8	PPFIA3
EP300	PTPRF	SLC22A2
SMAD3	HLA-DRB1	SLC1A2
INSR	CD276	PPFIA1
TCF7	HLA-E	SLC1A7
TJP1	ESAM	PPFIA2
RHOA	CDH15	SLC22A1
ACTN1	SPN	VAMP2
RAC1	ITGAM	SLC5A7
WASF1	CNTNAP2	ALDH5A1
SSX2IP	CLDN6	CPLX1
CSNK2A2	CLDN4	CHAT
YES1	HLA-DQA2	ARL6IP5
WASF2	JAM3	LIN7B
WAS	CLDN23	LIN7C
WASL	CLDN3	SLC38A2
ACTG1	PDCD1LG2	GLS
PTPN6	CD8B	SLC6A13
ERBB2	CLDN11	HSPA8
VCL	CD4	NAAA
CTNNA2	GLG1	GLS2
CSNK2B	SELE
SMAD4	CLDN5
TGFBR1	ITGB7
CSNK2A1	CLDN15
PARD3	CLDN18
PTPRB	CD8A
MAPK1	CLDN9
SMAD2	ITGA9
CDC42	CDH2
CREBBP	CDH4
RAC3	CADM3
TGFBR2	SELPLG
SRC	ITGAL
MAP3K7	CLDN14
CTNND1	NCAM2
CTNNB1	SDC3
SORBS1	PDCD1
ACP1	ALCAM
	ITGB2
	CLDN2
	ITGB1
	MADCAM1
	CLDN20
	CD226
	CD99
	ICAM2
	HLA-B
	CD6
	HLA-DQA1
	SIGLEC1
	ICAM1
	JAM2
	CLDN10
	NRXN3
	NLGN1
	CLDN7
	CD2
	ICOS
	HLA-G
	CLDN19
	MAG
	HLA-A
	ICAM3
	CNTN2
	MPZ
	HLA-F
	PVR
	SELL
	VCAM1
	HLA-C
	CD86
	CLDN22
	CDH3
	SDC4
	CNTNAP1
	CDH5
	CD80
	ITGB8
	SDC1
	CLDN17
	OCLN
	CD40LG
	NLGN4X
	CLDN16
	CLDN8
	CLDN1
	NRXN1
	HLA-DRB5
	CTLA4
	SELP
	CD28
	NLGN3
	ICOSLG
	ITGA4
	VCAN
	PTPRC
	CD34
